# Supplementary material for: Geographic Distribution and Phylogeny of Soricine Shrew-Borne Seewis Virus and Altai Virus in Russia
Source: MDPI journal article supplement (doi:10.3390/v13071286), 2021-07-01
Supplement: s1 [file s1]

## Supplementary Information

# Geographic Distribution and Phylogeny of Soricine Shrew-Borne Seewis Virus and Altai Virus in Russia

Liudmila N. Yashina <sup>1,\*</sup>, Sergey A. Abramov <sup>2</sup>, Alexander V. Zhigalin <sup>3</sup>, Natalia A. Smetannikova <sup>1</sup>, Tamara A. Dupal <sup>2</sup>, Anton V. Krivopalov <sup>2</sup>, Fuka Kikuchi <sup>4,5</sup>, Kae Senoo <sup>5,6</sup>, Satoru Arai <sup>5</sup>, Tetsuya Mizutani <sup>4</sup>, Motoi Suzuki <sup>5</sup>, Joseph A. Cook <sup>7</sup> and Richard Yanagihara <sup>8,\*</sup>

<sup>1</sup> State Research Center of Virology and Biotechnology, Vector, Koltsovo 630559, Russia; smetannikova@vector.nsc.ru

<sup>2</sup> Institute of Systematics and Ecology of Animals, Novosibirsk 630091, Russia; terio@eco.nsc.ru (S.A.A.); dupalgf54@gmail.com (T.A.D.); krivopalov@gmail.com (A.V.K.)

<sup>3</sup> Department of Vertebrate Zoology and Ecology, Tomsk State University, Tomsk 634050, Russia; alex-zhigalin@mail.ru

<sup>4</sup> Center for Infectious Disease Epidemiology and Prevention Research, Tokyo University of Agriculture and Technology, Tokyo 183-8538, Japan; S203828z@st.go.tuat.ac.jp (F.K.); tmizutan@cc.tuat.ac.jp (T.M.)

<sup>5</sup> Center for Surveillance, Immunization and Epidemiologic Research, National Institute of Infectious Diseases, Tokyo 162-8640, Japan; arais@nih.go.jp (S.A.); mosuzuki@niid.go.jp (M.S.)

<sup>6</sup> Faculty of Science, Tokyo University of Science, Tokyo 162-8601, Japan; 2319061@ed.tus.ac.jp

<sup>7</sup> Department of Biology and Museum of Southwestern Biology, University of New Mexico, Albuquerque, NM 87131, USA; cookjose@unm.edu

<sup>8</sup> Department of Pediatrics, John A. Burns School of Medicine, University of Hawaii at Manoa, Honolulu, HI 96813, USA

\* Correspondence: yashina@vector.nsc.ru (L.N.Y.); ryanagih@hawaii.edu (R.Y.)

**Citation:** Yashina, L.N.; Abramov, S.A.; Zhigalin, A.V.; Smetannikova, N.A.; Dupal, T.A.; Krivopalov, A.V.; Kikuchi, F.; Senoo, K.; Arai, S.; Mizutani, T.; et al. Geographic Distribution and Phylogeny of Soricine Shrew-Borne Seewis Virus and Altai Virus in Russia. *Viruses* **2021**, *13*, 1286. <https://doi.org/10.3390/v13071286>

Academic Editors: Kumiko Yoshimatsu, Hiroaki Kariwa

Received: 8 June 2021

Accepted: 28 June 2021

Published: 1 July 2021

**Publisher's Note:** MDPI stays neutral with regard to jurisdictional claims in published maps and institutional affiliations.

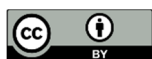

**Copyright:** © 2021 by the authors. Licensee MDPI, Basel, Switzerland. This article is an open access article distributed under the terms and conditions of the Creative Commons Attribution (CC BY) license (<http://creativecommons.org/licenses/by/4.0/>).

**Table S1.** Oligonucleotide primers used to amplify the S, M and L segments of soricine shrew-borne hantaviruses.

| Segment | Primer       | Sequence (5'-3') (Polarity)            |
|---------|--------------|----------------------------------------|
| SML     | OSM55        | TAG TAG TAG ACT CC (+/-)               |
| S       | S2FR         | TAG TAG TAK RCT CCC TAA ARA G (+/-)    |
|         | 4            | CCD GGT GTW AKY TCT TCW GC (-)         |
|         | SAF1         | GGA GCA YAA AGG RAA TAG GA (+)         |
|         | SAF2         | GGT GAT GAC ATG GAT GCT AAC (+)        |
|         | S2           | AGC TCA GGA TCC ATG TCA TC (-)         |
|         | SA3R         | CCA ATC WGC WGT YTG YCC AC (-)         |
| M       | M5           | TAG TAG TAG GAT CCG CAA GAA (+/-)      |
|         | MA600R       | CTT AGC YTG ATA CAT KGG YTG A (-)      |
|         | MA460F       | GAT CTG CCA GAC AGT CAG AAG (+)        |
|         | MA800R       | CAA GGG AGT AGC CTT GGA AGA AG (-)     |
|         | MA1195R      | CCT GTC GGY GAR AAG GCC TCA C (-)      |
|         | MA1490F      | TGT GTN CCW GGN TTY CAT GG (+)         |
|         | M1190F       | GGN CCN GGD GCW NVH TGT GA (+)         |
|         | M1500R       | CCC AAC CGT GWA CAC CWG TRA CAC (-)    |
|         | M2237F       | TTT CAY TGY TAT GGT GCD TG (+)         |
|         | MA2300R      | GGA TTG CAT GCC CAG CCA CTC TGG (-)    |
|         | M1990R       | ACW CCA TGT GCT GTA TCA TAC C (-)      |
|         | Han-M2631R   | CAT NAY RTC NCC RGG RTC NCC (-)        |
|         | M2620F       | GGA GAC ACA TTG GTT TTC CTT GGC (+)    |
|         | M3ER         | TAG TAG TAG ACT CCG CAA GAA (-)        |
|         | MA3300F      | GGT AAC TGG TGG GTM ATC C (+)          |
| L       | L5-1         | TTC TGC AGT AGT AGT AGA CTC CG (+)     |
|         | LH2          | ACA CCA TCA TTY CTY STA CTK GGC CA (-) |
|         | RPLV-L-366F  | RGT CAC TGT GAC AGY WGA TGT (+)        |
|         | SL-1458R     | AKT AIA TGS CCT ATA TGC CAT GC (-)     |
|         | LA5170F      | GGR AAR CAR TAT GAT GCH TAT TG (+)     |
|         | LA6070R      | GTA TAA GCA CTC TCA TCY TGC (-)        |
|         | PHL-2111F    | CAG TCW ACA RTT GGT GCA AGT GG         |
|         | HTL-2971R    | CWG GWG ACC AYT TIG TDG CAT C (-)      |
|         | LA6000F      | CAG GAT GAR AGT GCT TAT ACT RC (+)     |
|         | LA6440R      | ATA AAA GGA AGA GGA CCT RTC (-)        |
|         | L3R          | TAG TAG TAK GCT CCG CTG CAG (-)        |
|         | L1382F       | AGA AGG TAG GAC TTA TGC AGA CAC (+)    |
|         | L2215R       | CCA YGM AGV CCY TTY TCA AA (-)         |
|         | Han-L3588R   | GGN ATH GAN CAN GCA CAN CCY TCA AA (-) |
|         | L5178R       | CAA TAN GCA TCA TAY TGY TTN CC (-)     |
|         | PHL-3endR    | GAT WAA GCA TGA YTG GTC TGA (-)        |
|         | HAN-L-F1     | ATG TAY GTB AGT GCW GAT GC (+)         |
|         | HAN-L-R1     | AAC CAD TCW GTY CCR TCA TC (-)         |
|         | HAN-L-F2     | TGC WGA TGC HAC NAA RTG GTC (+)        |
|         | HAN-L-R2     | GCR TCR TCW GAR TGR TGD GCA A (-)      |
|         | RPLV-L-4837R | CYG TMC CYT CWA CAT TAC CTT (-)        |
|         | L3258F       | TCC CTT TAT AGT GTG GGT GTG A (+)      |
|         | L6388R       | CTC WGT YAA RTC ATA WGG ATC (-)        |
|         | L4091F       | AAA AGT GAT TTT GAA TTT CAT GAT A (+)  |
|         | L4718F       | CCA GAG GTT ATG CGT AGG GTA (+)        |
|         | PHL-5167R    | CAT AYT GYT THC CTG AAT AWG C (-)      |
|         | RPLV-L-4837R | CYG TMC CYT CWA CAT TAC CTT G (-)      |

Abbreviations: A, Adenine; B, C or G or T; C, Cytosine; D, A or G or T; G, Guanine; H, A or C or T; I, Inosine; K, G or T; M, A or C; N, any nucleotide; R, A or G; S, G or C; T, Thymine; V, A or C or G; W, A or T; Y, C or T.

**Table S2.** GenBank accession numbers and host information for soricine shrew-borne hantaviruses included in genetic and phylogenetic analysis.

| Virus Name              | Strain Name    | Country  | Location          | Host Species              | Sex    | Capture Date |      | S Segment<br>Accession<br>no. | M Segment<br>Accession<br>no. | L Segment<br>Accession<br>no. |
|-------------------------|----------------|----------|-------------------|---------------------------|--------|--------------|------|-------------------------------|-------------------------------|-------------------------------|
|                         |                |          |                   |                           |        | Month        | Year |                               |                               |                               |
| Lena River virus        | MSB148458      | Russia   | Amga River        | <i>Sorex caecutiens</i>   | male   | August       | 2006 | KM361045                      | KM361052                      | KM361057                      |
| Lena River virus        | MSB148573      | Russia   | Amga River        | <i>Sorex caecutiens</i>   | male   | August       | 2006 | KM361046                      | -                             | KM361058                      |
| Lena River virus        | MSB148574      | Russia   | Amga River        | <i>Sorex caecutiens</i>   | male   | August       | 2006 | KM361047                      | -                             | KM361059                      |
| Lena River virus        | MSB148575      | Russia   | Amga River        | <i>Sorex caecutiens</i>   | male   | August       | 2006 | -                             | -                             | MN401400                      |
| Lena River virus        | MSB148580      | Russia   | Amga River        | <i>Sorex caecutiens</i>   | male   | August       | 2006 | KM361044                      | KM361051                      | KM361056                      |
| Lena River virus        | Smin1108       | Poland   | Chmiel            | <i>Sorex minutus</i>      | female | September    | 2010 | -                             | -                             | MN244248                      |
| Lena River virus        | MSB148745      | Russia   | Kenkeme River     | <i>Sorex caecutiens</i>   | male   | August       | 2006 | KM361050                      | -                             | KM361060                      |
| Lena River virus        | MSB148793      | Russia   | Kenkeme River     | <i>Sorex caecutiens</i>   | female | August       | 2006 | KM361048                      | KM361053                      | KM361061                      |
| Lena River virus        | MSB148830      | Russia   | Kenkeme River     | <i>Sorex caecutiens</i>   | male   | August       | 2006 | -                             | -                             | MN401398                      |
| Lena River virus        | MSB148840      | Russia   | Kenkeme River     | <i>Sorex caecutiens</i>   | male   | August       | 2006 | MT951407                      | -                             | MN401399                      |
| Lena River virus        | MSB148679      | Russia   | Kenkeme River     | <i>Sorex roboratus</i>    | male   | August       | 2006 | KM361049                      | KM361054                      | KM361063                      |
| Lena River virus        | MSB148839      | Russia   | Kenkeme River     | <i>Sorex roboratus</i>    | female | August       | 2006 | -                             | -                             | KM361062                      |
| Lena River virus        | MSB146482      | Russia   | Lena River        | <i>Sorex caecutiens</i>   | male   | August       | 2010 | KM361043                      | -                             | KM361055                      |
| Lena River virus        | Khekhtsir-Sc67 | Russia   | Khekhtsir         | <i>Sorex caecutiens</i>   | female | February     | 2008 | MH499470                      | MH499471                      | MH499472                      |
| Lena River virus        | Parnaya-Sc1217 | Russia   | Parnaya           | <i>Sorex caecutiens</i>   | male   | August       | 2008 | MW505551                      | -                             | MW505552                      |
| Lena River virus        | MG361S013      | Mongolia | Hovsgol Lake      | <i>Sorex tundrensis</i>   | male   | August       | 2010 | MT544323                      | -                             | -                             |
| Altai virus             | MSB95363       | Hungary  | Nógrád            | <i>Sorex araneus</i>      | male   | July         | 1997 | GQ293127                      | -                             | GQ293104                      |
| Altai virus             | MSB95469       | Hungary  | Gyor-Sopron-Moson | <i>Sorex araneus</i>      |        | July         | 1997 | -                             | -                             | GQ293105                      |
| Altai virus             | ALT302         | Russia   | Teletskoye Lake   | <i>Sorex araneus</i>      | female | August       | 2007 | MK340902                      | MK340903                      | MT648514                      |
| Altai virus             | Parabel-Sa44   | Russia   | Parabel           | <i>Sorex araneus</i>      | male   | May          | 2019 | MT560057                      | -                             | MN815789                      |
| Altai virus             | Uurainen63L    | Finland  | Uurainen          | <i>Sorex araneus</i>      |        | October      | 2004 | -                             | -                             | KJ136623                      |
| Altai virus             | LohjaEWS10L    | Finland  | Lohja             | <i>Sorex araneus</i>      |        | November     | 2012 | -                             | -                             | KJ136638                      |
| Altai-like virus        | MSB148651      | Russia   | Amga River        | <i>Sorex minutissimus</i> | male   | August       | 2006 | -                             | -                             | MN244247                      |
| Seewis ortho-hantavirus | MSB148347      | Russia   | Amga River        | <i>Sorex caecutiens</i>   | male   | August       | 2006 | KM20149                       | KM201420                      | KM201421                      |
| Seewis ortho-hantavirus | MSB148436      | Russia   | Amga River        | <i>Sorex caecutiens</i>   | male   | August       | 2006 | -                             | KM201415                      | KM201416                      |

|                         |                  |         |                   |                         |        |           |      |          |          |          |
|-------------------------|------------------|---------|-------------------|-------------------------|--------|-----------|------|----------|----------|----------|
| Seewis ortho-hantavirus | MSB148457        | Russia  | Amga River        | <i>Sorex caecutiens</i> |        | August    | 2006 | -        | KM201417 | KM201418 |
| Seewis ortho-hantavirus | MSB148558        | Russia  | Amga River        | <i>Sorex caecutiens</i> | male   | August    | 2006 | KM201411 | KM201412 | KM201413 |
| Seewis ortho-hantavirus | MSB148559        | Russia  | Amga River        | <i>Sorex caecutiens</i> | female | August    | 2006 |          | MT951408 | KM201414 |
| Seewis ortho-hantavirus | ART502           | Russia  | Teletskoye Lake   | <i>Sorex caecutiens</i> | female | September | 2007 | MN815798 | EU424340 | EU424339 |
| Seewis ortho-hantavirus | Parnaya-Sc1205   | Russia  | Parnaya           | <i>Sorex caecutiens</i> | female | August    | 2008 | KU253274 | -        | KU253275 |
| Seewis ortho-hantavirus | Telet-Sc170      | Russia  | Teletskoye Lake   | <i>Sorex caecutiens</i> | male   | August    | 2019 | -        | -        | MN815794 |
| Seewis ortho-hantavirus | Galkino-Sc2712   | Russia  | Galkino           | <i>Sorex caecutiens</i> | female | November  | 2007 | MG888404 | MG913807 | MG860918 |
| Seewis ortho-hantavirus | Khekhtsir-Sc1126 | Russia  | Khekhtsir         | <i>Sorex caecutiens</i> | female | July      | 2007 | MG888405 | MG913808 | MG860919 |
| Seewis ortho-hantavirus | DGR18207         | Finland | Lappi             | <i>Sorex araneus</i>    | female | August    | 1982 | GQ293126 | -        | GQ293103 |
| Seewis ortho-hantavirus | DGR18228         | Finland | Hame              | <i>Sorex araneus</i>    | male   | August    | 1982 | GQ293125 | -        | GQ293101 |
| Seewis ortho-hantavirus | DGR18283         | Finland | Hame              | <i>Sorex araneus</i>    | female | August    | 1982 | GU186445 | -        | GQ293100 |
| Seewis ortho-hantavirus | DGR18279         | Finland | Hame              | <i>Sorex araneus</i>    | female | August    | 1982 | GQ293131 | -        | GQ293110 |
| Seewis ortho-hantavirus | DGR18874         | Finland | Oulun Lääni       | <i>Sorex araneus</i>    | female | August    | 1982 | GQ293132 | -        | GQ293111 |
| Seewis ortho-hantavirus | DGR18887         | Finland | Oulun Lääni       | <i>Sorex araneus</i>    | female | August    | 1982 | GQ293133 | -        | GQ293112 |
| Seewis ortho-hantavirus | DGR18889         | Finland | Oulun Lääni       | <i>Sorex araneus</i>    | male   | August    | 1982 | GQ293134 | -        | GQ293114 |
| Seewis ortho-hantavirus | DGR18890         | Finland | Oulun Lääni       | <i>Sorex araneus</i>    | male   | August    | 1982 | GQ293130 | -        | GQ293109 |
| Seewis ortho-hantavirus | DGR18891         | Finland | Oulun Lääni       | <i>Sorex araneus</i>    | female | August    | 1982 | GQ293129 | -        | GQ293108 |
| Seewis ortho-hantavirus | MSB95461         | Hungary | Gyor-Sopron-Moson | <i>Sorex araneus</i>    | female | July      | 1997 | -        | -        | GQ293098 |
| Seewis ortho-hantavirus | MSB95462         | Hungary | Gyor-Sopron-Moson | <i>Sorex araneus</i>    | female | July      | 1997 | GQ293124 | -        | GQ293097 |
| Seewis ortho-hantavirus | MSB95463         | Hungary | Gyor-Sopron-Moson | <i>Sorex araneus</i>    | female | July      | 1997 | GQ293136 | GQ293140 | GQ293116 |
| Seewis ortho-hantavirus | MSB95464         | Hungary | Gyor-Sopron-Moson | <i>Sorex araneus</i>    | female | July      | 1997 | GQ293137 |          | GQ293117 |
| Seewis ortho-hantavirus | MSB95468         | Hungary | Gyor-Sopron-Moson | <i>Sorex araneus</i>    | female | July      | 1997 | GQ293128 | -        | GQ293106 |
| Seewis ortho-hantavirus | MSB95480         | Hungary | Gyor-Sopron-Moson | <i>Sorex araneus</i>    |        | July      | 1997 | -        | GQ293139 | GQ293121 |
| Seewis ortho-hantavirus | MSB94609         | Hungary | Zala              | <i>Sorex araneus</i>    | male   | June      | 2000 | GQ293138 | -        | GQ293123 |
| Seewis ortho-hantavirus | MSB94615         | Hungary | Zala              | <i>Sorex araneus</i>    |        | June      | 2000 | GQ293135 | -        | GQ293115 |
| Seewis ortho-hantavirus | Kemerovo-Sa65    | Russia  | Kemerovo          | <i>Sorex araneus</i>    | male   | July      | 2008 | GQ284582 | -        | GQ267812 |
| Seewis ortho-hantavirus | Karasuk-Sa56     | Russia  | Karasuk           | <i>Sorex araneus</i>    | male   | June      | 2008 | GQ284586 | -        | GQ267809 |
| Seewis ortho-hantavirus | Krasn-Sa5        | Russia  | Krasnoyarsk       | <i>Sorex araneus</i>    |        | August    | 2008 | GQ284584 | -        | GQ267811 |

|                         |                |        |              |                      |        |        |      |          |   |          |
|-------------------------|----------------|--------|--------------|----------------------|--------|--------|------|----------|---|----------|
| Seewis ortho-hantavirus | Shish-Sa3      | Russia | Shish        | <i>Sorex araneus</i> |        | June   | 2017 |          | - | MK005198 |
| Seewis ortho-hantavirus | Pokrov-Sa689   | Russia | Pokrovka     | <i>Sorex araneus</i> | female | June   | 2008 | -        | - | MK005199 |
| Seewis ortho-hantavirus | Parnaya-Sa1191 | Russia | Parnaya      | <i>Sorex araneus</i> | female | August | 2008 | -        | - | MG279208 |
| Seewis ortho-hantavirus | Parnaya-Sa1196 | Russia | Parnaya      | <i>Sorex araneus</i> | male   | August | 2008 | -        | - | MG279209 |
| Seewis ortho-hantavirus | Parnaya-Sa1197 | Russia | Parnaya      | <i>Sorex araneus</i> | female | August | 2008 | MG279214 | - | MG279210 |
| Seewis ortho-hantavirus | Parnaya-Sa1212 | Russia | Parnaya      | <i>Sorex araneus</i> | male   | August | 2008 | MG279215 | - | MG279211 |
| Seewis ortho-hantavirus | Parnaya-Sa1220 | Russia | Parnaya      | <i>Sorex araneus</i> | male   | August | 2008 | GQ284580 | - | GQ267810 |
| Seewis ortho-hantavirus | MShush-Sa1077  | Russia | Middle Shush | <i>Sorex araneus</i> | male   | August | 2008 | MG279216 | - | MG279212 |
| Seewis ortho-hantavirus | MShush-Sa1081  | Russia | Middle Shush | <i>Sorex araneus</i> | female | August | 2008 | MG279217 | - | MG279213 |
| Seewis ortho-hantavirus | TBY-Sa5        | Russia | Belyi Yar    | <i>Sorex araneus</i> | male   | April  | 2019 | -        | - | MT560032 |
| Seewis ortho-hantavirus | TBY-Sa6        | Russia | Belyi Yar    | <i>Sorex araneus</i> | male   | April  | 2019 | -        | - | MT560033 |
| Seewis ortho-hantavirus | TV-Sa18        | Russia | Volkovo      | <i>Sorex araneus</i> | female | April  | 2019 | -        | - | MT560034 |
| Seewis ortho-hantavirus | TK2-Sa3        | Russia | Kargasok     | <i>Sorex araneus</i> | male   | August | 2019 | -        | - | MT560037 |
| Seewis ortho-hantavirus | TK2-Sa4        | Russia | Kargasok     | <i>Sorex araneus</i> | female | August | 2019 | -        | - | MT560038 |
| Seewis ortho-hantavirus | TK2-Sa11       | Russia | Kargasok     | <i>Sorex araneus</i> | male   | August | 2019 | -        | - | MT560039 |
| Seewis ortho-hantavirus | TK2-Sa12       | Russia | Kargasok     | <i>Sorex araneus</i> | female | August | 2019 | -        | - | MT560040 |
| Seewis ortho-hantavirus | TK2-Sa14       | Russia | Kargasok     | <i>Sorex araneus</i> | female | August | 2019 | -        | - | MT560041 |
| Seewis ortho-hantavirus | TK2-Sa15       | Russia | Kargasok     | <i>Sorex araneus</i> | female | August | 2019 | -        | - | MT560042 |
| Seewis ortho-hantavirus | TK2-Sa23       | Russia | Kargasok     | <i>Sorex araneus</i> | male   | August | 2019 | -        | - | MT560043 |
| Seewis ortho-hantavirus | TK2-Sa25       | Russia | Kargasok     | <i>Sorex araneus</i> | female | August | 2019 | -        | - | MT560044 |
| Seewis ortho-hantavirus | TK2-Sa30       | Russia | Kargasok     | <i>Sorex araneus</i> | male   | August | 2019 | -        | - | MT560045 |
| Seewis ortho-hantavirus | TK-Sa30        | Russia | Kargasok     | <i>Sorex araneus</i> | male   | May    | 2019 | -        | - | MT560035 |
| Seewis ortho-hantavirus | TK-Sa33        | Russia | Kargasok     | <i>Sorex araneus</i> | female | May    | 2019 | -        | - | MT560036 |
| Seewis ortho-hantavirus | TK-Sa35        | Russia | Kargasok     | <i>Sorex araneus</i> | female | May    | 2019 | -        | - | MN815783 |
| Seewis ortho-hantavirus | TK-Sa37        | Russia | Kargasok     | <i>Sorex araneus</i> | male   | August | 2019 | -        | - | MN815784 |
| Seewis ortho-hantavirus | TK-Sa39        | Russia | Kargasok     | <i>Sorex araneus</i> | male   | May    | 2019 | -        | - | MN815785 |
| Seewis ortho-hantavirus | TP2-Sa34       | Russia | Parabel      | <i>Sorex araneus</i> | female | August | 2019 | -        | - | MT560046 |
| Seewis ortho-hantavirus | TP2-Sa49       | Russia | Parabel      | <i>Sorex araneus</i> | male   | August | 2019 | -        | - | MT560047 |

|                         |                 |         |                 |                      |        |           |      |          |          |          |
|-------------------------|-----------------|---------|-----------------|----------------------|--------|-----------|------|----------|----------|----------|
| Seewis ortho-hantavirus | TP-Sa42         | Russia  | Parabel         | <i>Sorex araneus</i> | male   | May       | 2019 | -        | -        | MN815787 |
| Seewis ortho-hantavirus | TP-Sa41         | Russia  | Parabel         | <i>Sorex araneus</i> | male   | May       | 2019 | -        | -        | MN815786 |
| Seewis ortho-hantavirus | TP-Sa50         | Russia  | Parabel         | <i>Sorex araneus</i> | female | May       | 2019 | -        | -        | MN815788 |
| Seewis ortho-hantavirus | Telet-Sa24      | Russia  | Teletskoye Lake | <i>Sorex araneus</i> | male   | June      | 2018 | -        | -        | MT560048 |
| Seewis ortho-hantavirus | Telet-Sa116     | Russia  | Teletskoye Lake | <i>Sorex araneus</i> | female | August    | 2019 | -        | -        | MN815790 |
| Seewis ortho-hantavirus | Telet-Sa120     | Russia  | Teletskoye Lake | <i>Sorex araneus</i> | male   | August    | 2019 | -        | -        | MN815791 |
| Seewis ortho-hantavirus | Telet-Sa129     | Russia  | Teletskoye Lake | <i>Sorex araneus</i> | male   | August    | 2019 | -        | -        | MN815792 |
| Seewis ortho-hantavirus | Telet-Sa130     | Russia  | Teletskoye Lake | <i>Sorex araneus</i> | male   | August    | 2019 | -        | -        | MN815793 |
| Seewis ortho-hantavirus | Telet-Sa198     | Russia  | Teletskoye Lake | <i>Sorex araneus</i> | female | August    | 2019 | -        | -        | MN815795 |
| Seewis ortho-hantavirus | Telet-Sa250     | Russia  | Teletskoye Lake | <i>Sorex araneus</i> | male   | August    | 2019 | -        | -        | MN815796 |
| Seewis ortho-hantavirus | Telet-Sa300     | Russia  | Teletskoye Lake | <i>Sorex araneus</i> | female | August    | 2007 | MN815797 | -        | EU424334 |
| Seewis ortho-hantavirus | Telet-Sa321     | Russia  | Teletskoye Lake | <i>Sorex araneus</i> | male   | August    | 2007 | GQ284575 | -        | EU424337 |
| Seewis ortho-hantavirus | Telet-Sa500     | Russia  | Teletskoye Lake | <i>Sorex araneus</i> | female | September | 2007 | GQ284576 | -        | EU424338 |
| Seewis ortho-hantavirus | Telet-Sa2318    | Russia  | Teletskoye Lake | <i>Sorex araneus</i> | male   | October   | 2009 | -        | -        | MK005197 |
| Seewis ortho-hantavirus | Choya-Sa310     | Russia  | Choya           | <i>Sorex araneus</i> | female | August    | 2019 | -        | -        | MT560049 |
| Seewis ortho-hantavirus | Choya-Sa331     | Russia  | Choya           | <i>Sorex araneus</i> | female | August    | 2019 | -        | -        | MT560050 |
| Seewis ortho-hantavirus | Choya-Sa350     | Russia  | Choya           | <i>Sorex araneus</i> | female | August    | 2019 | -        | -        | MT560051 |
| Seewis ortho-hantavirus | Choya-Sa356     | Russia  | Choya           | <i>Sorex araneus</i> | female | August    | 2019 | -        | -        | MT560052 |
| Seewis ortho-hantavirus | Choya-Sa357     | Russia  | Choya           | <i>Sorex araneus</i> | female | August    | 2019 | -        | -        | MT560053 |
| Seewis ortho-hantavirus | Choya-Sa358     | Russia  | Choya           | <i>Sorex araneus</i> | male   | August    | 2019 | -        | -        | MT560054 |
| Seewis ortho-hantavirus | Choya-Sa376     | Russia  | Choya           | <i>Sorex araneus</i> | male   | August    | 2019 | -        | -        | MT560055 |
| Seewis ortho-hantavirus | Choya-Sa377     | Russia  | Choya           | <i>Sorex araneus</i> | male   | August    | 2019 | -        | -        | MT560056 |
| Seewis ortho-hantavirus | 48/Lappeenranta | Finland | Lappeenranta    | <i>Sorex araneus</i> |        | August    | 2010 | KJ136609 | KJ136603 | -        |
| Seewis ortho-hantavirus | 21/Muonio/2009  | Finland | Muonio          | <i>Sorex araneus</i> |        | June      | 2009 | KJ136610 | KJ136604 | -        |
| Seewis ortho-hantavirus | 33/Laihia/2005  | Finland | Laihia          | <i>Sorex araneus</i> |        | October   | 2005 | KJ136611 | -        | -        |
| Seewis ortho-hantavirus | EWS1/Hanko      | Finland | Hanko           | <i>Sorex araneus</i> |        | October   | 2012 | KJ136612 | KJ136607 | -        |
| Seewis ortho-hantavirus | EWS13/Lohja     | Finland | Lohja           | <i>Sorex araneus</i> |        | November  | 2012 | KJ136613 | KJ136605 | -        |
| Seewis ortho-hantavirus | EWS25/Tammela   | Finland | Tammela         | <i>Sorex araneus</i> |        | August    | 2012 | KJ136614 | KJ136608 | -        |

|                           |                           |                |               |                          |        |          |      |          |          |          |
|---------------------------|---------------------------|----------------|---------------|--------------------------|--------|----------|------|----------|----------|----------|
| Seewis ortho-hantavirus   | 13/Kuopio                 | Finland        | Kuopio        | <i>Sorex araneus</i>     |        | August   | 2010 | KJ136615 | -        | -        |
| Seewis ortho-hantavirus   | EWS26/Tammela             | Finland        | Tammela       | <i>Sorex araneus</i>     |        | August   | 2012 | -        | KJ136606 | -        |
| Seewis ortho-hantavirus   | EWS25L                    | Finland        | -             | <i>Sorex araneus</i>     |        | August   | 2012 | -        | -        | KJ136634 |
| Seewis ortho-hantavirus   | Irkutsk-Sd475             | Russia         | Irkutsk       | <i>Sorex daphaenodon</i> | female | June     | 2007 | GQ284573 | -        | GQ267806 |
| Seewis ortho-hantavirus   | Irkutsk-St489             | Russia         | Irkutsk       | <i>Sorex tundrensis</i>  | male   | June     | 2007 | GQ284574 | -        | GQ267807 |
| Seewis ortho-hantavirus   | Galkino-St2714            | Russia         | Galkino       | <i>Sorex tundrensis</i>  | female | November | 2007 | MG888402 | MG913806 | MH499473 |
| Seewis ortho-hantavirus   | Galkino-St48              | Russia         | Galkino       | <i>Sorex tundrensis</i>  | female | February | 2008 | MG888403 | -        | MG888365 |
| Seewis ortho-hantavirus   | MG373S022                 | Mongolia       | Hovsgol Lake  | <i>Sorex tundrensis</i>  | male   | August   | 2010 | MT544324 | -        | -        |
| Asikkala ortho-hantavirus | -                         | Finland        | -             | <i>Sorex minutus</i>     |        | October  | 2005 | KJ136616 | -        | KJ136628 |
| Asikkala ortho-hantavirus | CZ/Beskydy/412/2010/Sm    | Czech Republic | Beskydy       | <i>Sorex minutus</i>     |        |          | 2010 | KC880341 | KC880344 | KC880347 |
| Asikkala ortho-hantavirus | CZ/Drahany/420/2010/Sm    | Czech Republic | Drahany       | <i>Sorex minutus</i>     |        |          | 2010 | KC880342 | KC880345 | KC880348 |
| Asikkala ortho-hantavirus | DE/Duerrbach/1912/2009/Sm | Germany        | Duerrbach     | <i>Sorex minutus</i>     |        |          | 2009 | KC880343 | KC880346 | KC880349 |
| Kenkeme ortho-hantavirus  | MSB148794                 | Russia         | Kenkeme River | <i>Sorex roboratus</i>   | male   | August   | 2006 | GQ306148 | GQ306149 | GQ306150 |
| Boginia virus             | LaihiaL                   | Finland        | Laihia        | <i>Neomys fodiens</i>    |        | October  | 2005 | -        | -        | KJ136642 |
